# Supplementary material for: A macroevolution-inspired approach to reveal novel antibiotic resistance mechanisms
Source: eLife. 2026 Jun 8;13:RP101940. doi: 10.7554/eLife.101940 (PMC13246000; doi:10.7554/eLife.101940)
Supplement: Figure 2—source data 1. [file elife-101940-fig2-data1.xlsx]

## Sheet: Exp1
File	Score	Formula	RT	Precursor	Mass	Ions	Height	Area	Abund	Diff (ppm)	Drug concentration	Average height	STDEV height	Area corrected by concentration	STD dev corrected by concentration	Concentration height (single point)	Average concentration	STDDEV	Normalised [RIF]	Average normalised [RIF]	STDEV normalised [RIF]
12A_conceptionense_RIF	98.96	C43 H58 N4 O12	5.464	845.394	822.408	10	1462715	22052848	3065	3.12	729.093	692110	1.00804e+06	949.275	1382.6	3.15616	1.49339	2.17509	0.00432888	0.00204829	0.00298328
12B_conceptionense_RIF	99.47	C43 H58 N4 O12	6.957	823.412	822.405	5	15497	182189	13626	-0.44						0.0334385			4.58631e-05
12C_conceptionense_RIF	99.45	C43 H58 N4 O12	7.173	823.412	822.405	4	27716	375337	13825	-0.5						0.0598039			8.20251e-05
12D_conceptionense_RIF	99.06	C43 H58 N4 O12	7.205	823.412	822.404	5	22163	279042	11864	-0.86						0.047822			6.5591e-05
12E_conceptionense_RIF	99.72	C43 H58 N4 O12	5.442	845.395	822.408	9	2613394	35827571	8638	3.77						5.63902			0.0077343
12F_conceptionense_RIF	99.32	C43 H58 N4 O12	6.836	823.412	822.405	4	11177	129286	6794	-0.08						0.0241171			3.30782e-05
16A_flavescens_RIF	85.44	C43 H58 N4 O12	5.526	823.417	822.409	6	192172	2311389	75677	4.76	91.1367	134950	105755	1480.74	1160.4	0.414657	0.291187	0.228192	0.00454984	0.00319505	0.00250385
16B_flavescens_RIF	86.28	C43 H58 N4 O12	5.492	823.416	822.409	7	300896	3600664	113929	4.53						0.649255			0.00712397
16C_flavescens_RIF	84.78	C43 H58 N4 O12	7.144	823.41	822.403	3	2054	22408	1175	-2.15						0.004432			4.86302e-05
16D_flavescens_RIF	84.15	C43 H58 N4 O12	7.124	823.41	822.403	3	1922	18178	1364	-2.65						0.00414718			4.5505e-05
16E_flavescens_RIF	96.47	C43 H58 N4 O12	5.446	823.414	822.407	8	153100	1636519	57409	1.64						0.33035			0.00362478
16F_flavescens_RIF	93.13	C43 H58 N4 O12	5.445	823.415	822.407	8	159555	1650601	60630	2.69						0.344278			0.0037776
32A_smegmatis_RIF	99.03	C43 H58 N4 O12	6.733	823.413	822.405	5	66619	1035269	29137	0.23	729.093	47976.5	26009	65.803	0.54212	0.143746	0.103521	0.0561207	0.000197158	0.000141986	7.69733e-05
32B_smegmatis_RIF	99.15	C43 H58 N4 O12	6.793	823.412	822.404	5	30988	355089	21636	-0.78						0.066864			9.17085e-05
32C_smegmatis_RIF	99.36	C43 H58 N4 O12	6.835	823.413	822.405	5	90514	1276589	36748	0.5						0.195306			0.000267875
32D_smegmatis_RIF	99.79	C43 H58 N4 O12	6.908	823.413	822.405	4	58574	742672	28658	0.04						0.126387			0.000173349
32E_smegmatis_RIF	99.54	C43 H58 N4 O12	6.784	823.412	822.405	4	20570	233958	7417	-0.31						0.0443847			6.08766e-05
32F_smegmatis_RIF	99.74	C43 H58 N4 O12	6.911	823.413	822.405	4	20594	195224	8483	0.14						0.0444365			6.09476e-05
36A_tuberculosis_RIF	75.38	C43 H58 N4 O12	5.522	823.418	822.411	5	55487	667986	20275	6.75	1.42902	25982.5	17084.4	18182	11955.3	0.119727	0.0560635	0.0368636	0.0837821	0.039232	0.0257964
36B_tuberculosis_RIF	84.13	C43 H58 N4 O12	5.517	823.417	822.409	4	17859	233733	6750	5.02						0.0385351			0.026966
36C_tuberculosis_RIF	70.55	C43 H58 N4 O12	5.72	823.418	822.412	4	14192	188634	5389	7.72						0.0306226			0.0214291
36E_tuberculosis_RIF	98.97	C43 H58 N4 O12	5.439	823.413	822.406	4	16392	191731	6299	1.06						0.0353697			0.0247509
8A_branderi_RIF	98.7	C43 H58 N4 O12	5.524	845.394	822.407	10	619690	7650780	3949	1.92	364.547	939589	310705	2577.42	852.306	1.33713	2.02739	0.670421	0.00366793	0.0055614	0.00183905
8B_branderi_RIF	99.21	C43 H58 N4 O12	5.506	845.394	822.407	9	455134	5440100	3501	1.73						0.982061			0.00269392
8C_branderi_RIF	99.5	C43 H58 N4 O12	5.622	845.395	822.408	10	948129	11917774	8607	3.14						2.04582			0.00561194
8D_branderi_RIF	98.63	C43 H58 N4 O12	5.625	845.396	822.408	11	1346934	17187423	10485	3.96						2.90633			0.00797246
8E_branderi_RIF	99.79	C43 H58 N4 O12	5.472	845.394	822.407	9	1114615	14203719	10120	2.56						2.40505			0.00659737
8F_branderi_RIF	99.51	C43 H58 N4 O12	5.473	845.395	822.407	10	1153031	14408981	10339	2.68						2.48794			0.00682475
batch_1_drug_1a	89.02	C43 H58 N4 O12	4.898	823.413	822.405	8	172295	2333557	71783	0.42
batch_1_drug_2a	90.53	C43 H58 N4 O12	4.916	823.411	822.404	6	73491	827795	54092	-1.1
batch_1_drug_3a	82.24	C43 H58 N4 O12	4.948	823.41	822.404	7	29700	381868	23157	-1.91
batch_1_drug_4a	73.58	C43 H58 N4 O12	7.026	823.409	822.401	8	25346	664822	17035	-5.25
batch_1_drug_6a	87.19	C43 H58 N4 O12	5.49	845.398	822.412	9	27209111	392725460	4545	8.32
batch_1_drug_7a	98.35	C43 H58 N4 O12	5.491	845.395	822.41	10	18652243	251117618	3640	5.49
batch_1_drug_8a	97.09	C43 H58 N4 O12	5.499	845.395	822.41	9	12665110	164943197	2671	5.47
batch_1_drug_9a	97.54	C43 H58 N4 O12	5.421	845.396	822.409	11	3434093	40510121	81419	4.28
batch_2_drug_1b	84.84	C43 H58 N4 O12	1.569	823.411	822.403	7	138575	839755	47244	-3.12
batch_2_drug_2b	85.71	C43 H58 N4 O12	6.98	823.41	822.402	7	46235	672480	28716	-3.52
batch_2_drug_4a	87.26	C43 H58 N4 O12	19.39	823.414	822.407	5	6237	66116	936	1.72
batch_2_drug_5b	97.94	C43 H58 N4 O12	5.408	845.394	822.408	10	20598086	286119309	8194	3.32
batch_2_drug_6b	99.32	C43 H58 N4 O12	5.423	845.395	822.409	10	13349153	176460432	9081	4.19
batch_2_drug_7b	98.72	C43 H58 N4 O12	5.391	845.395	822.409	11	8797629	116819079	8685	4.61
batch_2_drug_8b	99.69	C43 H58 N4 O12	5.406	845.395	822.409	10	5093664	68811311	8953	4.09
batch_2_drug_9b	99.08	C43 H58 N4 O12	5.44	845.395	822.409	10	3285922	44304176	7421	4.4
batch_2a_drug_1a	78.14	C43 H58 N4 O12	5.225	823.41	822.404	6	115940	1988289	42714	-2
batch_2a_drug_2a	84.12	C43 H58 N4 O12	2.68	823.41	822.403	6	14102	62161	7479	-2.71
batch_2a_drug_3b	95.88	C43 H58 N4 O12	5.395	845.395	822.409	10	34493175	562313129	6602	4.52
batch_2a_drug_4b	98.37	C43 H58 N4 O12	5.412	845.394	822.408	10	27163458	401812191	7791	2.88
batch_2a_drug_6a	70.27	C43 H58 N4 O12	19.413	845.394	822.405	5	1962	5637	545	0.2
batch_2a_drug_9a	70.45	C43 H58 N4 O12	6.78	823.413	822.406	6	518212	8172586	235993	0.58
batch_3_drug_1a	92.65	C43 H58 N4 O12	6.793	823.412	822.404	7	83868	735937	51856	-1.4
batch_3_drug_2a	89.44	C43 H58 N4 O12	6.797	823.41	822.403	7	47619	427636	29128	-2.98
batch_3_drug_3a	97.14	C43 H58 N4 O12	5.474	845.396	822.41	10	27196232	432324438	5041	5.51
batch_3_drug_4a	99.56	C43 H58 N4 O12	5.484	845.395	822.409	9	20806565	305290065	5764	4.43
batch_3_drug_5a	94.57	C43 H58 N4 O12	5.493	845.397	822.41	9	14814629	202308300	6362	5.63
batch_3_drug_6a	97.55	C43 H58 N4 O12	5.499	845.396	822.409	10	9615554	128083949	6060	4.58
batch_3_drug_7a	99.11	C43 H58 N4 O12	5.49	845.395	822.408	9	6124647	80218870	4940	3.77
batch_3_drug_8a	98.14	C43 H58 N4 O12	5.499	845.395	822.409	9	3620687	48957818	4348	4.56
batch_3_drug_9a	95.52	C43 H58 N4 O12	5.432	845.396	822.407	10	1287169	13918208	72594	2.74
	Concentration	Height	Area	Abund
batch_3_drug_1a	1000	83868	735937	51856
batch_3_drug_2a	500	47619	427636	29128
batch_3_drug_3a	250	27196232	432324438	5041
batch_3_drug_4a	125	20806565	305290065	5764
batch_3_drug_5a	62.5	14814629	202308300	6362
batch_3_drug_6a	31.25	9615554	128083949	6060
batch_3_drug_7a	15.625	6124647	80218870	4940
batch_3_drug_8a	7.8125	3620687	48957818	4348
batch_3_drug_9a	3.90625	1287169	13918208	72594

## Sheet: Exp2
File	Score	Score (Lib)	Show/Hide	Cpd	ID Source	Name	Formula	Flags (Tgt)	Saturated	RT	Precursor	Mass	Ions	Height	Area	Abund	Diff (ppm)	Flag Severity (Tgt)	Average height	STDEV height	Calculated concentration (curve)	Calculated concentration (single point)	Average	STDEV	Drug added	Concentration normalised by drug	Average normalised	STDEV normalised
POS_10F_flavescens_RIF.d	99.07		TRUE	1	FBF		C43 H58 N4 O12			307.7	823.413	822.406	8	46985	640234	16323	0.96	Pass	54425.5	13876.6	-0.0109703	0.0124733	0.0144486	0.00368389	91.1367	0.000136864	0.000158538	4.04216e-05
POS_10G_flavescens_RIF.d	98.74		TRUE	1	FBF		C43 H58 N4 O12			305.7	823.414	822.406	9	60163	829546	19713	1.16	Pass			-0.00657767	0.0159718				0.000175251
POS_10H_flavescens_RIF.d	99.69		TRUE	1	FBF		C43 H58 N4 O12			304.6	823.413	822.405	8	36831	515796	12443	0.4	Pass			-0.014355	0.00977771				0.000107286
POS_10I_flavescens_RIF.d	99.37		TRUE	1	FBF		C43 H58 N4 O12			306.5	845.395	822.406	9	73723	990688	6325	1.38	Pass			-0.00205767	0.0195716				0.00021475
POS_18F_smegmatis_RIF.d	98.95		TRUE	1	FBF		C43 H58 N4 O12			302.3	845.395	822.406	10	374440	4752333	45456	1.04	Pass	445809	102366	0.0981813	0.0994045	0.118351	0.0271755	729.093	0.00109072	0.00129861	0.000298185
POS_18G_smegmatis_RIF.d	95.94		TRUE	1	FBF		C43 H58 N4 O12			304.3	845.396	822.408	10	564019	6791136	68182	2.83	Pass			0.161374	0.149733				0.00164295
POS_18H_smegmatis_RIF.d	97.97		TRUE	1	FBF		C43 H58 N4 O12			303.8	845.396	822.407	10	526673	6596668	62355	2.06	Pass			0.148926	0.139819				0.00153416
POS_18I_smegmatis_RIF.d	99.31		TRUE	1	FBF		C43 H58 N4 O12			304.8	845.395	822.406	10	318103	4013882	37631	1.27	Pass			0.0794023	0.0844484				0.000926613
POS_22F_tuberculosis_RIF.d	85.55		TRUE	1	FBF		C43 H58 N4 O12			305.6	823.414	822.408	5	3364	38955	1156	2.91	Pass	3213	208.166	-0.0255107	0.000893058	0.000852972	5.52628e-05	1.42902	9.79911e-06	9.35926e-06	6.06373e-07
POS_22G_tuberculosis_RIF.d	95.12		TRUE	1	FBF		C43 H58 N4 O12			307.3	823.413	822.405	5	3314	36250	1154	0.27	Pass			-0.0255273	0.000879785				9.65346e-06
POS_22H_tuberculosis_RIF.d	94.1		TRUE	1	FBF		C43 H58 N4 O12			308.3	823.413	822.405	5	2854	34894	1013	0.09	Pass			-0.0256807	0.000757666				8.31351e-06
POS_22I_tuberculosis_RIF.d	90.03		TRUE	1	FBF		C43 H58 N4 O12			306.1	823.413	822.406	5	3320	39124	1071	1.36	Pass			-0.0255253	0.000881377				9.67094e-06
POS_4F_branderi_RIF.d	88.82		TRUE	1	FBF		C43 H58 N4 O12			304.2	845.398	822.409	10	630454	7697667	56869	5	Pass	577539	67866.8	0.183519	0.16737	0.153322	0.018017	364.547	0.00183647	0.00168233	0.000197692
POS_4G_branderi_RIF.d	98.65		TRUE	1	FBF		C43 H58 N4 O12			303.2	845.395	822.407	10	652448	7558501	61899	1.71	Pass			0.190851	0.173209				0.00190054
POS_4H_branderi_RIF.d	99.08		TRUE	1	FBF		C43 H58 N4 O12			303.6	845.395	822.406	10	483272	5857884	47817	1.05	Pass			0.134459	0.128297				0.00140774
POS_4I_branderi_RIF.d	90.34		TRUE	1	FBF		C43 H58 N4 O12			302.6	845.398	822.409	10	543983	6542046	50847	4.63	Pass			0.154696	0.144414				0.00158459
POS_7F_conceptionense_RIF.d	85.96		TRUE	1	FBF		C43 H58 N4 O12			303.6	845.399	822.41	10	462593	6168635	48200	5.53	Pass	446648	68537.9	0.127566	0.122807	0.118574	0.0181951	729.093	0.0013475	0.00130106	0.000199647
POS_7G_conceptionense_RIF.d	95.74		TRUE	1	FBF		C43 H58 N4 O12			305.5	845.396	822.408	11	533742	6855847	56186	3.09	Pass			0.151282	0.141695				0.00155476
POS_7H_conceptionense_RIF.d	98.83		TRUE	1	FBF		C43 H58 N4 O12			306.4	845.395	822.407	10	448242	5988828	47284	1.73	Pass			0.122782	0.118997				0.0013057
POS_7I_conceptionense_RIF.d	95.64		TRUE	1	FBF		C43 H58 N4 O12			305.1	845.397	822.408	10	342017	4594876	34647	3.11	Pass			0.0873737	0.090797				0.000996273
POS_A.d	99.33		TRUE	1	FBF		C43 H58 N4 O12			1185.7	845.394	822.405	9	171822	14751582	13695	0.08	Pass
POS_B.d	99.82		TRUE	1	FBF		C43 H58 N4 O12			1193.5	823.412	822.405	7	32929	2990055	12719	-0.33	Pass
POS_C.d	99.07		TRUE	1	FBF		C43 H58 N4 O12			1184.5	823.412	822.405	6	8175	423243	4697	-0.54	Pass
POS_D.d	95.33		TRUE	1	FBF		C43 H58 N4 O12			1195.5	823.411	822.404	4	3521	291596	1426	-1.38	Pass
POS_E.d	96.58		TRUE	1	FBF		C43 H58 N4 O12			303.5	845.396	822.408	10	256328	3303466	26221	2.85	Pass
POS_F.d	99.33		TRUE	1	FBF		C43 H58 N4 O12			303.9	845.395	822.406	9	98091	1312656	9710	1.29	Pass
POS_G.d	98.36		TRUE	1	FBF		C43 H58 N4 O12			303.7	845.396	822.407	9	81220	1068713	7319	2.17	Pass
POS_H.d	97.32		TRUE	1	FBF		C43 H58 N4 O12			305.6	845.396	822.407	9	84011	1086523	7863	2.23	Pass
POS_I.d	98.87		TRUE	1	FBF		C43 H58 N4 O12			304.4	845.395	822.406	9	78784	1047313	7403	1.16	Pass
POS_J.d	98.71		TRUE	1	FBF		C43 H58 N4 O12			305.5	845.395	822.406	9	77929	1041966	7385	1.29	Pass
POS_k.d	94.84		TRUE	1	FBF		C43 H58 N4 O12			305.4	845.397	822.408	9	79002	1042538	7152	2.99	Pass
Vial		RIF	RIF uM	LZD	LZD uM	BDQ	BDQ uM
	Stock concentration (mg/mL)	50	60757.8	50	148216	10	18001.7
A	1 uL in 27uL	0.56	680.487	0.6	1778.59	2.8	5040.47
B	1/10 dilution (3 uL in 27 uL)	0.056	68.0487	0.06	177.859	0.28	504.047
C	1/10 dilution (3 uL in 27 uL)	0.0056	6.80487	0.006	17.7859	0.028	50.4047
D	1/10 dilution (3 uL in 27 uL)	0.00056	0.680487	0.0006	1.77859	0.0028	5.04047
E	1/10 dilution (3 uL in 27 uL)	5.6e-05	0.0680487	6e-05	0.177859	0.00028	0.504047
F	1/10 dilution (3 uL in 27 uL)	5.6e-06	0.00680487	6e-06	0.0177859	2.8e-05	0.0504047
G	1/10 dilution (3 uL in 27 uL)	5.6e-07	0.000680487	6e-07	0.00177859	2.8e-06	0.00504047
H	1/10 dilution (3 uL in 27 uL)	5.6e-08	6.80487e-05	6e-08	0.000177859	2.8e-07	0.000504047
I	1/10 dilution (3 uL in 27 uL)	5.6e-09	6.80487e-06	6e-09	1.77859e-05	2.8e-08	5.04047e-05
J	1/10 dilution (3 uL in 27 uL)	5.6e-10	6.80487e-07	6e-10	1.77859e-06	2.8e-09	5.04047e-06
K	1/10 dilution (3 uL in 27 uL)	5.6e-11	6.80487e-08	6e-11	1.77859e-07	2.8e-10	5.04047e-07
	Concentration	Height	Area	Abund
POS_k.d	6.80487e-08	79002	1042538	7152
POS_J.d	6.80487e-07	77929	1041966	7385
POS_I.d	6.80487e-06	78784	1047313	7403
POS_H.d	6.80487e-05	84011	1086523	7863
POS_G.d	0.000680487	81220	1068713	7319
POS_F.d	0.00680487	98091	1312656	9710
POS_E.d	0.0680487	256328	3303466	26221
POS_D.d	0.680487	3521	291596	1426
POS_C.d	6.80487	8175	423243	4697
POS_B.d	68.0487	32929	2990055	12719
POS_A.d	680.487	171822	14751582	13695

## Sheet: Exp3
File	Score	Formula	RT	Precursor	Mass	Ions	Height	Area	Abund	Diff (ppm)	Concentration by height	Average [RIF]	STDEV [RIF	[RIF] added	Concentration normalized by outside [RIF]	Average of normalized [RIF]	SD
POS_RIF.d	95.66	C43 H58 N4 O12	283.6	845.396	822.408	11	30046428	281471760	574254	3.47	10
POS-11A_brandA_RIF.d	96.23	C43 H58 N4 O12	285	845.396	822.408	11	20534870	187937938	527871	3.08	6.83438	7.61029	2.10732	729.565	0.00936775	0.0104313	0.00288846
POS-11B_brandB_RIF.d	95.52	C43 H58 N4 O12	285.8	845.397	822.408	11	26055256	226791283	634435	3.15	8.67167			729.565	0.0118861
POS-11C_brandC_RIF.d	93.82	C43 H58 N4 O12	287	845.397	822.408	11	29071566	266403116	619606	3.64	9.67555			729.565	0.0132621
POS-11D_brandD_RIF.d	96.67	C43 H58 N4 O12	288	845.396	822.408	12	10071118	79898037	394222	2.93	3.35185			729.565	0.00459432
POS-11E_brandE_RIF.d	95.41	C43 H58 N4 O12	284.9	845.397	822.407	12	23958445	217488053	778932	2.79	7.97381			729.565	0.0109295
POS-11F_brandF_RIF.d	94.69	C43 H58 N4 O12	285.8	845.397	822.408	12	27505944	250985921	721919	3.17	9.15448			729.565	0.0125479
POS-27A_flavA_RIF.d	98.96	C43 H58 N4 O12	285.6	845.395	822.407	11	2132329	19733722	123217	2.31	0.709678	0.889483	0.245774	182.391	0.00389097	0.00487679	0.00134751
POS-27B_flavB_RIF.d	98.92	C43 H58 N4 O12	285.3	845.395	822.407	10	2955605	23215367	162014	2.62	0.983679			182.391	0.00539324
POS-27C_flavC_RIF.d	99.09	C43 H58 N4 O12	287.7	845.395	822.407	10	2631298	22456374	161107	2.51	0.875744			182.391	0.00480146
POS-27D_flavD_RIF.d	99	C43 H58 N4 O12	287.3	845.395	822.407	11	1701546	13885677	90557	2.35	0.566306			182.391	0.00310489
POS-27E_flavE_RIF.d	94.05	C43 H58 N4 O12	285.8	845.397	822.408	11	4065474	31909648	328945	4.03	1.35306			182.391	0.00741847
POS-27F_flavF_RIF.d	99.2	C43 H58 N4 O12	285.3	845.395	822.407	10	2549217	19579928	172064	1.73	0.848426			182.391	0.00465168
POS-31A_tubercA_RIF.d	98.36	C43 H58 N4 O12	285.9	823.413	822.405	8	66279	520564	20998	-0.54	0.0220589	0.0210972	0.00131227	1.42995	0.0154263	0.0147538	0.000917706
POS-31B_tubercB_RIF.d	98.17	C43 H58 N4 O12	289.7	823.413	822.404	7	63914	497781	19919	-0.84	0.0212717			1.42995	0.0148759
POS-31C_tubercC_RIF.d	99.3	C43 H58 N4 O12	286.8	823.413	822.404	8	62881	506469	20361	-1.2	0.0209279			1.42995	0.0146355
POS-31D_tubercD_RIF.d	99.3	C43 H58 N4 O12	287.8	823.413	822.404	8	57921	465704	18654	-1.47	0.0192772			1.42995	0.013481
POS-31E_tubercE_RIF.d	91	C43 H58 N4 O12	284.6	823.415	822.406	7	59611	478971	18619	1.48	0.0198396			1.42995	0.0138744
POS-31F_tubercF_RIF.d	95.67	C43 H58 N4 O12	285.6	823.413	822.405	7	69731	539948	21289	0.24	0.0232078			1.42995	0.0162298
POS-39A_smegA_RIF.d	98.91	C43 H58 N4 O12	286.5	845.396	822.408	12	2342607	18293637	129147	3.05	0.779662	1.05667	0.482348	182.391	0.00427467	0.00579345	0.00264458
POS-39B_smegB_RIF.d	99.09	C43 H58 N4 O12	284.5	845.395	822.407	11	2516655	21211683	146234	2.82	0.837589			182.391	0.00459226
POS-39C_smegC_RIF.d	96.61	C43 H58 N4 O12	286.6	845.396	822.407	12	6011918	43999427	554072	2.72	2.00088			182.391	0.0109702
POS-39E_smegE_RIF.d	97.59	C43 H58 N4 O12	286.6	845.396	822.408	12	2960606	23465145	216615	2.89	0.985344			182.391	0.00540236
POS-39F_smegF_RIF.d	99.49	C43 H58 N4 O12	285.3	845.395	822.407	10	2042853	16410156	139418	2.26	0.679899			182.391	0.00372769

## Sheet: Overall
File	Average concentration	STDDEV
branderi	2.02739	0.670421
conceptionense	1.49339	2.17509
flavescens	0.291187	0.228192
smegmatis	0.103521	0.0561207
tuberculosis	0.0560635	0.0368636
File	Average	STDEV
branderi	0.153322	0.018017
conceptionense	0.118574	0.0181951
flavescens	0.0144486	0.00368389
smegmatis	0.118351	0.0271755
tuberculosis	0.000852972	5.52628e-05
File	Average	STDEV
branderi	7.61029	2.10732
flavescens	0.889483	0.245774
smegmatis	1.05667	0.482348
tuberculosis	0.0210972	0.00131227
