# Supplementary material for: A macroevolution-inspired approach to reveal novel antibiotic resistance mechanisms
Source: eLife. 2026 Jun 8;13:RP101940. doi: 10.7554/eLife.101940 (PMC13246000; doi:10.7554/eLife.101940)
Supplement: Supplementary file 3. [file elife-101940-supp3.xlsx]

## Sheet: rif-binding_conservation
ARR-ms				ARR1p1	ARR1p2	ARR1p3	ARR3p1	ARR3p2
F	9	(CZ)	RIF binding	FFFFFFFFFFFFFFFFFFFFFFFFFFFFFFFFFFFFFFFFFFFFFFFFFFFFFFFFFFFFFFFFFFFFFFFFFFFFFFFFFFFFFFFF	FYFFFFF	FFFFFFFF	SSSSSLSSSSSSSSSSSSS	GADNGDTASGAGDDDS-GNDDNDAATDSGGSGGSDEDT
F	39	(CD1) & (CE2)	RIF binding	YYYYYFFYYYYYYYYYFFYYFYYFYYYYYYFFFYYYHHFFFFFYYYFYFFYYYFYFYYYYYHYFFYYYYYYYYFYYYFYYYYYYYYYY	YYYFYYY	YYYYYYYY	YYYYYYYYYYYYYYYYYYY	YYYYYYYYYYYYYYYYYYYYYYYYYYYYYYYYYYYYYY
D	55	(OD2)	RIF binding	DDDDDDDDDDDDDDDDDDDDDDDDDDDDDDDDDDDDDDDDDDDDDDDDDDDDDDDDDDDDDDDDDDDDDDDDDDDDDDDDDDDDDDDD	DADADDD	IVIVIIIV	DDDDDDEDDDDNDDDENDD	DDDDDSDDDDDDSNDDDTDDDDSDDSDDDDDDDDDDDD
A	56	(CB)	RIF binding	AAAAAAAAAAAAAAAAAAAAAAAAAAAAAAAAAAAAAAAAAAAAAAAAAAAAAAAAAAAAAAAAAAAAAAAAAAAAAAAAAAAAAAAA	AAGGGGG	GGGGGGGG	GGGGGGGGGGGGGGGGGGG	GGGGGGGGGGGGGGGGGGGGGGGGGGGGGGGGGGGGGG
W	59	(C ) & (CD1)	RIF binding	WWWWWWWWWWWWWWWWWWWWWWWWWWWWWWWWWWWWWWWWWWWWWWWWWWWWWWWWWWWWWWWWWWWWWWWWWWWWWWWWWWWWWWWW	LLLLLLL	LLLLLLLL	LLLLLLLLLLLLLLLLLLL	LLLLLLLLLLLLLLLLLLLLLLLLLLLLLLLLLLLLLL
G	60	(CA)	RIF binding	GGGGGGGGGGGGGGGGGGGGAGGGGGGGGGGGAGGGGGGAAGGGGGGGGGGGGGGGGGGGGGGGGGGGGGGGGGGGGGGGGGGGGGGA	AAAAAAA	AAAAAAAA	AAAAAAAAAAAAAAAAAAA	AAAAAAAAAAAAAAAAAAAAAAAAAAAAAAAAAAAAAA
L	63	(CD1)	RIF binding	MMLLLMLMFLLMLLMLLLMLLLLLLMMLLLLLLFMMLLLMMMLLMLMLLLLLMMMLLLMLMLLLMMMMMMLLLLFLMLLLLMLLLMML	LFLLMMM	MMMMMMMM	IIIIIIIIIIIIILIIIII	LLLLLLLLVLLLLLLVLLLLLLLLLLLVLLLVLVLLLV
N	86	(O) & (OD1)	RIF binding	NNNNNNNNNNNNNNNNNNNNNNNNNNNNNNNNNNNNNNNNNNNNNNNNNNNNNNNNNNNNNNNNNNNNNNNNNNNNNNNNNNNNNNNN	NNNNNNN	NNNNNNNN	NNNNNNNNNNNNNNNNNNN	NNNNNNNNNNNNNNNNNNNNNNNNNNNNNNNNNNNNNN
V	87	(CG) & (O)	RIF binding	VVVVVVVVVVVVVVVVVVVVVVVVVVVVVVVVVVVVVVVVVVVVVVVVVVVVVVVVVVVVVVVVVVVVVVVVVVVVVVVVVVVVVVVV	VVVVVVV	VVVVVVVV	AVVVVVVVVVVVVVVVVVV	VVVVVVVVVVVVVVVVVVVVVVVVVVVVVVVVVVVVVV
D	89	(N)	RIF binding	DDDDDDDDDDDDDDDDDDDDDDDDDDDDDDDDDDDDDDDDDDDDDDDDDDDDDDDDDDDDDDDDDDDDDDDDDDDDDGDDDDDDDDDD	DDDDDDD	DDDDDDDD	DDDDDDDDDDDDDDDDDDD	DDDDDDDDDDDDDDDDDDDDDDDDDDDDDDDDDDDDDD
K	91	(CB), (CE), (CG),(N)	RIF binding	KKKKKKKKKKKRKRKKKKKKKKKKKKRRKKKKKKKKKKKKKKKKKKKKKKKKRKKKKKKKKRKKKKKKKKKKKKKKKKKKRRKKKRKK	KKKKKKK	KKKKKKKK	KKKKKKKKKKKKKKKKKKK	KKKKKKKKKKKKKKKKKRKKKKKKKKKKKKKKKKKKKE
L	92	(N) & (O)	RIF binding	LLLLLLLLLFLLLFLLLLLFLLLLFLLLFLLLLLMLFFLYYLLLLFLLFFFLHLLFLFLLLFLLMLLLLLFFLLLFLFLFLLLLLLLF	FAFFFFF	FFFFFFFF	FFFFFFFFFFFFFFFFFFF	FFFFFFFFFFFFFFFFFFFFFFFFFFFFFFFFFFFFFF
S	99	(OG)	RIF binding	SSSSSSSSSSSSSSSSSSSSSSSSSSSSSSSSSSSSSSSSSSSSSSSSSSSSSSSSSSSSSSSSSSSSSSSSSSSSSSSSSSSSSSSS	SSSSSSS	SSSSSSSS	SSSSSSSSSSSSSSSSSSS	SSSSSSSSSSSSSSSSSSSSSSSSSSSSSSSSSSSSSS
M	126	(CA), (SD)	RIF binding	MMMMMMMMMMMMMMMMMMMMMMMMMMMMMMMMMMMMMMMMMMMMMMMMMMMMMMMMMMMMMMMMMMMMMMMKMMMMMMMMMMMMMMMR	FFFFFFF	FFFFFFFF	WWWWWWWWWWWWWWWWWWW	WWWWWWWWWWWWWWWWWWWWWWWWWWWWWWWWWWWWWW
G	129	(CA)	RIF binding	GGNGGGNTGGGSSNGGTNGGLGVGGGTAGGGGRGGTGGGVVGGGTGGRTSAGTGGGSGGGGSGGTGGGTTRRRGGGGSGGTTRRRSGL	GRGRGGG	GGGGGGGG	RRRRRRRRRRRRRRRRRRR	RRRRRRRRRRRRRRRRRRRRRRRRRRRRRRRRRRRRRR
L	130	(CD2)	RIF binding	LLLLLLLLLLLLLLLLLLLLLLLLLLLLLLLLLLLLLLLLLLLLLLLLLLLLLLLLLLLLLLLLLLLLLLLLLLLLLLLLLLLLLLLL	LLLLLLL	LLLLLLLL	LLLLLLLLLLLLLLLLLLL	LLLLLLLLLLLLLLLLLLLLLLLLLLLLLLLLLLLLLL
L	133	(CD1)	RIF binding	LLLLLLLLLLLLLLLLLLLLLLLLLLLLLLLLLLLLLLLLLLLLLLLLLLLLLLLLLLLLLLLLLLLLLLLLLLLLLLLLLLLLLLLL	LLLLILL	LLLLLLLL	LLLLLLLLLLLLLLLLLLL	LIILILLIILIILLLILLILLLLVVLIIIILILILLLI
V	140	(O)	RIF binding	VVVVVVVVVVVVVVVVVVVVVVVVVVVVVVVVVVVVVVVVVVVVVVVVVVVVVVVVVVVVVVVVVVVVVVVVVVVVVVVVVVVVVVVV	VVVVVVV	VVVVIVVV	EEEEEEEEVEVEEDEEEVE	EEEEEEEEEEEEEEEEEEEEEEEEEEEEEEEEEEEEEE
D	84		catalysis	DDDDDDDDDDDDDDDDDDDDDDDDDDDDDDDDDDDDDDDDDDDDDDDDDDDDDDDDDDDDDDDDDDDDDDDDDDDDDDDDDDDDDDDD	DDDDDDD	DDDDDDDD	DDDDDDDDDDDDDDDDDDD	DDDDDDDDDDDDDDDDDDDDDDDDDDDDDDDDDDDDDD
H	19		catalysis	HHHHHHHHHHHHHHHHHHHHHHHHHHHHHHHHHHHHHHHHHHHHHHHHHHHHHHHHHHHHHHHHHHHHHHHHHHHHHHHHHHHHHHHH	HHHHHHH	HHHHHHHH	HHHHHHHHHHHHHHHHHHH	HHHHHHHHHHHHHHHHHHHHHHHHHHHHHHHHHHHHHH
Y	49		catalysis	YYYYYYYYYYYYYYYYYYYYYYYYYYYYYYYYYYYYYYYYYYYYYYYYYYYYYYYYYYYYYYYYYYYYYYYYYYYYYYYYYYYYYYYY	YYYYYYY	YYYYYYYY	YYYYYYYYYYYYYYYYYYY	YYYYYYYYYYYYYYYYYYYYYYYYYYYYYYYYYYYYYY
