# Supplementary material for: A macroevolution-inspired approach to reveal novel antibiotic resistance mechanisms
Source: eLife. 2026 Jun 8;13:RP101940. doi: 10.7554/eLife.101940 (PMC13246000; doi:10.7554/eLife.101940)
Supplement: Supplementary file 4. [file elife-101940-supp4.xlsx]

## Sheet: Rifamycins_structure_MIC
Drug	Structure	MIC (µg/mL)
		M. smegmatis	M. conceptionense	M. flavescens
Rifampicin		25	50	25
Rifaximin		25	50	12.5
Rifapentine		12.5	12.5	6.25
Rifabutin		1.56	3.125	1.56
Rifamycin S		12.5	25	6.25
Rifamycin B		>200	25	100

## Sheet: CRISPRI_sgRNA
Primer name	Sequence
Mcarr1-T	GGGAATCTTCACCGGCTCGCGGGTGCG
Mcarr1-B	AAACCGCACCCGCGAGCCGGTGAAGAT
McarrX-T	GGGAACCTGAAGGTCCGCCTTGGTGCC
McarrX-B	AAACGGCACCAAGGCGGACCTTCAGGT
GG_vector-F	AATATGCTCTTCAGGATCTGACCAGGGAAAATAGCC
GG_vector-R	TTTATGCTCTTCACTGAAAATAAAAAAGGGGACCTCTAGGG
pLJR962_sequencing-F	TGCGGCGCTTTTTTTTTTGAATTC
plJR962_sequencing-R	CTGCGTTATCCCCTGATTCTG
